# Supplementary material for: Distant ultrafast energy transfer in a trimetallic {Ru–Ru–Cr} complex facilitated by hole delocalization
Source: Royal Society of Chemistry journal article supplement (doi:10.1039/c6cp06562g), 2016-12-20
Supplement: c6cp06562g1.pdf [file c6cp06562g1.pdf]

Electronic Supplemental Information

## Distant ultrafast energy-transfer in a trimetallic {Ru-Ru-Cr} complex facilitated by hole delocalization

Alejandro Cadranel, Jaired Tate, Paola S. Oviedo, Shiori Yamazaki, José H. Hodak, Luis M. Baraldo, and Valeria D. Kleiman

**Figure S1:**  $^1\text{H}$  NMR spectrum of **2** in acetone- $d_6$ . Signals are assigned as described in the text.

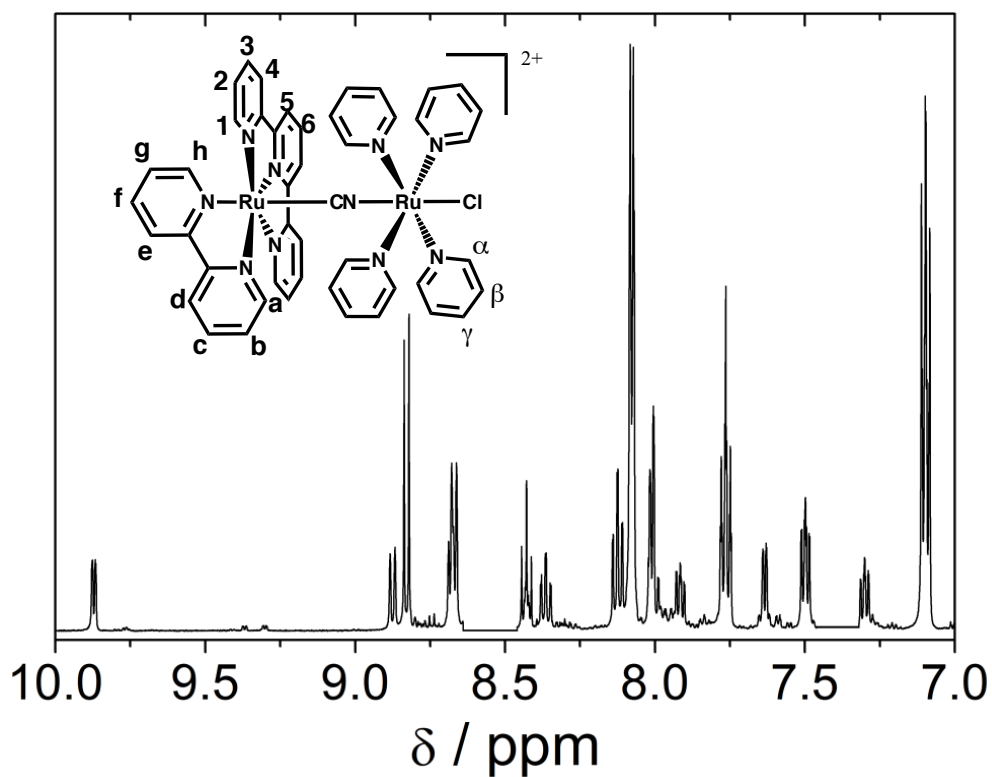

**Table S1.** Selected distances and angles of the crystallographic structures of **1**, **2**, and **3**.Data for **1** is taken from reference <sup>1</sup>

| <b>1</b>                                  | <b>2</b>  | <b>3</b>  | <b>1</b>                                        | <b>2</b> | <b>3</b>  |
|-------------------------------------------|-----------|-----------|-------------------------------------------------|----------|-----------|
| Distances / Å                             |           |           | Angles / °                                      |          |           |
| <b>Ru<sub>tb</sub>-N<sub>tpv</sub></b>    |           |           | <b>N-Ru<sub>tb</sub>-N<sub>tpv</sub></b>        |          |           |
| 1.966(2)                                  | 1.951(8)  | 1.958(8)  | 79.23(10)                                       | 79.0(4)  | 78.8(4)   |
| 2.060(2)                                  | 2.082(9)  | 2.075(10) | 79.33(9)                                        | 79.4(3)  | 79.5(4)   |
| 2.078(2)                                  | 2.087(8)  | 2.094(10) |                                                 |          |           |
| <b>Ru<sub>tb</sub>-N<sub>bpy</sub></b>    |           |           | <b>N-Ru<sub>tb</sub>-N<sub>bpy</sub></b>        |          |           |
| 2.049(2)                                  | 2.093(9)  | 2.078(8)  | 78.52(8)                                        | 77.1(4)  | 78.4(4)   |
| 2.076(2)                                  | 2.122(10) | 2.086(9)  |                                                 |          |           |
| <b>Ru<sub>pv</sub>-N<sub>pv</sub></b>     |           |           |                                                 |          |           |
| -                                         | 2.085(11) | 2.076(10) |                                                 |          |           |
| -                                         | 2.098(10) | 2.077(10) |                                                 |          |           |
| -                                         | 2.102(12) | 2.100(9)  |                                                 |          |           |
| -                                         | 2.112(13) | 2.112(9)  |                                                 |          |           |
| <b>Ru<sub>tb</sub>-C<sub>bridge</sub></b> |           |           | <b>Ru<sub>tb</sub>-C-N<sub>bridge</sub></b>     |          |           |
| -                                         | 1.970(12) | 2.007(12) | -                                               | 176.9(9) | 174.3(11) |
| <b>C-N<sub>bridge</sub></b>               |           |           | <b>C-N<sub>bridge</sub>-Ru<sub>pv</sub></b>     |          |           |
| -                                         | 1.163(14) | 1.123(13) | -                                               | 175.2(9) | 176.6(10) |
| <b>N<sub>bridge</sub>-Ru<sub>pv</sub></b> |           |           | <b>N<sub>bridge</sub>-Ru-N<sub>bridge</sub></b> |          |           |
| -                                         | 2.028(10) | 2.030(8)  | -                                               | -        | 176.9(4)  |
| <b>Ru<sub>tb</sub>-Ru<sub>pv</sub></b>    |           |           | <b>Ru<sub>tb</sub>-N-C<sub>bridge</sub></b>     |          |           |
| -                                         | 5.155     | 5.148     | 170.1(2)                                        | -        | 167.8(11) |
| <b>Ru-N<sub>bridge</sub></b>              |           |           | <b>N-C<sub>bridge</sub>-Cr</b>                  |          |           |
| 2.037(2)                                  | -         | 2.020(9)  | 173.8(3)                                        | -        | 174.8(11) |
| <b>N-C<sub>bridge</sub></b>               |           |           | <b>Ru<sub>tb</sub>-Ru<sub>pv</sub>-Cr</b>       |          |           |
| 1.144(3)                                  | -         | 1.177(15) | -                                               | -        | 164.8     |
| <b>Ru<sub>tb</sub>-Cr</b>                 |           |           |                                                 |          |           |
| 5.218                                     | -         | 10.279    |                                                 |          |           |

**Table S2.** Crystallographic data of **2** and **3**. CCDC 1505901 and 1023002 contains the supplementary crystallographic data for **2** and **3** respectively. These data can be obtained free of charge from the Cambridge Crystallographic Data Center via [www.ccdc.cam.ac.uk/data\\_request/cif](http://www.ccdc.cam.ac.uk/data_request/cif).

| Empirical Formula                                                | C <sub>47</sub> H <sub>43</sub> Cl F <sub>12</sub> N <sub>10</sub> O P <sub>2</sub> Ru <sub>2</sub> | C <sub>54</sub> H <sub>45</sub> Cr N <sub>16</sub> O <sub>8</sub> Ru <sub>2</sub> S |
|------------------------------------------------------------------|-----------------------------------------------------------------------------------------------------|-------------------------------------------------------------------------------------|
| Formula weight                                                   | 1291.44                                                                                             | 1332.26                                                                             |
| <i>T</i> (K)                                                     | 298 (2)                                                                                             | 298 (2)                                                                             |
| Crystal system                                                   | Monoclinic                                                                                          | Monoclinic                                                                          |
| Space Group                                                      | P2 <sub>1</sub> /c                                                                                  | P2 <sub>1</sub>                                                                     |
| <i>a</i> (Å)                                                     | 13.779(3)                                                                                           | 12.3182(17)                                                                         |
| <i>b</i> (Å)                                                     | 18.119(4)                                                                                           | 22.004(2)                                                                           |
| <i>c</i> (Å)                                                     | 22.414(4)                                                                                           | 13.2118(17)                                                                         |
| $\beta$ (°)                                                      | 92.599(15)                                                                                          | 109.093(14)                                                                         |
| <i>V</i> (Å <sup>3</sup> )                                       | 5590(2)                                                                                             | 3384.0(6)                                                                           |
| <i>Z</i>                                                         | 4                                                                                                   | 2                                                                                   |
| <i>D</i> <sub>calc</sub> (mg/m <sup>3</sup> )                    | 1.534                                                                                               | 1.307                                                                               |
| Absorption coefficient (mm <sup>-1</sup> )                       | 0.729                                                                                               | 0.686                                                                               |
| <i>F</i> (000)                                                   | 2584                                                                                                | 1346                                                                                |
| Crystal size (mm)                                                | 0.06 x 0.18 x 0.48                                                                                  | 0.03 x 0.40 x 0.45                                                                  |
| Crystal color/shape                                              | dark red/ plate                                                                                     | red/ plate                                                                          |
| Radiation, graphite monochr.                                     | MoK $\alpha$ , $\lambda$ = 0.71069 Å                                                                | MoK $\alpha$ , $\lambda$ = 0.71069 Å                                                |
| $\theta$ Range data collection (°)                               | 3.58-29.11                                                                                          | 3.62– 27.00                                                                         |
| Index ranges                                                     | -12 ≤ <i>h</i> ≤ 17                                                                                 | -14 ≤ <i>h</i> ≤ 15                                                                 |
|                                                                  | -22 ≤ <i>k</i> ≤ 22                                                                                 | -28 ≤ <i>k</i> ≤ 24                                                                 |
|                                                                  | -28 ≤ <i>l</i> ≤ 28                                                                                 | -16 ≤ <i>l</i> ≤ 16                                                                 |
| Reflections collected/unique                                     | 27324/11547 (R <sub>int</sub> = 0.1715)                                                             | 18321/ 11793 (R <sub>int</sub> = 0.0949)                                            |
| Observed reflections [ <i>I</i> >2 $\sigma$ ( <i>I</i> )]        | 5155                                                                                                | 8209                                                                                |
| Completeness (%)                                                 | 0.996                                                                                               | 0.80                                                                                |
| Maximum / minimum transmission                                   | 1.000 / 0.45450                                                                                     | 1.000 / 0.72899                                                                     |
| Refinement method                                                | full-matrix least-squares on <i>F</i> <sup>2</sup>                                                  | full-matrix least-squares on <i>F</i> <sup>2</sup>                                  |
| Weights, <i>w</i>                                                | 1/[ $\sigma^2(F_o^2) + (0.1669P)^2 + 0.0000P$ ]<br>where $P = (F_o^2 + 2F_c^2)/3$                   | 1/[ $\sigma^2(F_o^2) + (0.1273P)^2 + 0.0000P$ ]<br>where $P = (F_o^2 + 2F_c^2)/3$   |
| Data/restraints/parameters                                       | 11547/8/676                                                                                         | 11793/1/742                                                                         |
| Goodness-of-fit (GOF) on <i>F</i> <sup>2</sup>                   | 1.017                                                                                               | 1.059                                                                               |
| Final R-index [ <i>I</i> >2 $\sigma$ ( <i>I</i> )] / all data    | 0.1127/0.2005                                                                                       | 0.0874/ 0.1142                                                                      |
| <i>w</i> R index [ <i>I</i> >2 $\sigma$ ( <i>I</i> )] / all data | 0.2734/0.3624                                                                                       | 0.2135/0.2583                                                                       |
| Largest peak and hole (e Å <sup>-3</sup> )                       | 1.503 and -0.843                                                                                    | 2.154 and -0.936                                                                    |

**Table S3** - Electrochemical data for complexes **1**, **2** and **3**. a) Irreversible, cathodic peak. Data for **1** is taken from ref.<sup>1</sup>

| Comp.    | Solvent               | $E_{1/2} (\Delta E_p)/V$ (mV) |                           |             |             |                    |
|----------|-----------------------|-------------------------------|---------------------------|-------------|-------------|--------------------|
|          |                       | Ru <sub>pp</sub> (III/II)     | Ru <sub>py</sub> (III/II) | tpy(0/-)    | bpy(0/-)    | Cr(III/II)         |
| <b>1</b> | ACN                   | 1.10 (190)                    | -                         | -1.28 (120) | -1.60 (130) | -1.83 <sup>a</sup> |
| <b>2</b> | ACN                   | 1.60 (80)                     | 0.73 (80)                 | -1.17 (120) | -1.54 (200) | -                  |
| <b>3</b> | DMSO/H <sub>2</sub> O | 1.64 (nd)                     | 1.05 (nd)                 | -1.13 (nd)  | -1.49 (nd)  | nd                 |

**Table S4:** Assignment of IR absorption bands.

| Complex  | $\nu_{CN} / \text{cm}^{-1}$ | Assignment |
|----------|-----------------------------|------------|
| <b>1</b> | 2119                        | terminal   |
| <b>2</b> | 2096                        | bridge     |
| <b>3</b> | 2127                        | terminal   |
|          | 2120(sh)                    | bridge     |
|          | 2104                        | bridge     |

**Table S5** - UV-vis

| Comp.                | Solvent | UV-Vis abs.                                                                 |                                        |
|----------------------|---------|-----------------------------------------------------------------------------|----------------------------------------|
|                      |         | $\lambda_{MLCT} / \text{nm} (\epsilon / 10^3 \text{M}^{-1} \text{cm}^{-1})$ |                                        |
|                      |         | $\pi^*(py) \leftarrow d\pi(\text{Ru})$                                      | $\pi^*(pp) \leftarrow d\pi(\text{Ru})$ |
| <b>1<sup>1</sup></b> | DMSO    | -                                                                           | 353 (5.5) (sh)<br>478 (8.9)            |
| <b>2</b>             | DMSO    | 380 (19.1)                                                                  | 440 (10.3) (sh)                        |
| <b>3</b>             | DMSO    | 368 (20.0)                                                                  | 450 (7.0)                              |

**Figure S3:** Emission lifetimes measured in DMSO. The fits correspond to monoexponential decays.

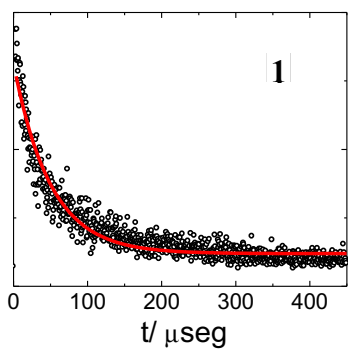

$$\tau_1 = 49\mu\text{sec}$$

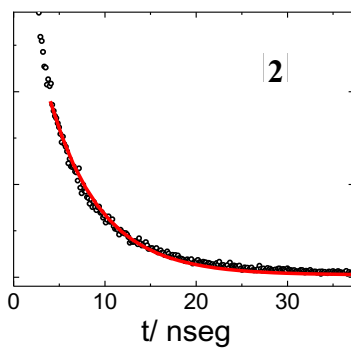

$$\tau_2 = 5.6\text{nsec}$$

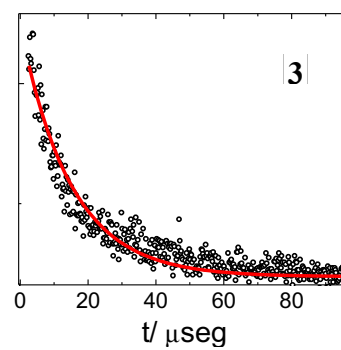

$$\tau_3 = 15\mu\text{sec}$$

**Figure S4:** Broadband Transient absorption spectra of compounds **2** (top) and **3** (bottom) in DMSO upon excitation at 400 nm leading to  $\pi^*(py) \leftarrow t_{2g}(\text{Ru})$  absorption. The spectra shown correspond to negative times (—), 1 ps (—), 5 -for **2**- and 14 ps -for **3**- (—), 25 -for **2**- and 50 ps -for **3**- (—), and 240 -for **2**- and 300 ps -for **3**- (—). The gap (380- 420 nm) is from the removal of pump scatter.

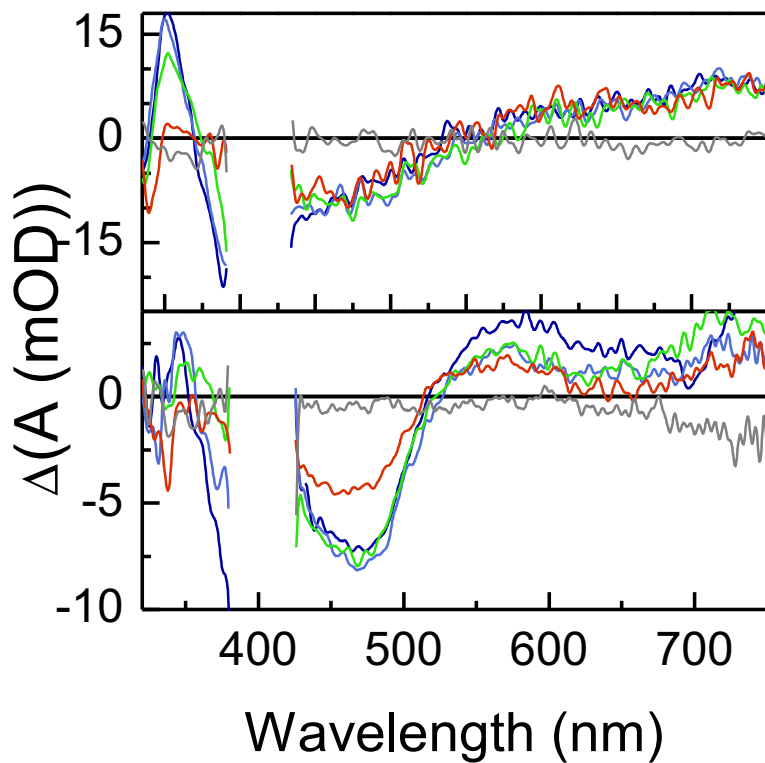

**Figure S5:** Spectral evolution and difference spectra during  $\{\text{Ru}^{\text{II}}(\text{py})_4\} \rightarrow \{\text{Ru}^{\text{III}}(\text{py})_4\}$  oxidation process (initial: solid black curve, final: dashed red curve, intermediate: grey curves) of complexes **2** (left) and **3** (right) in DMSO (0.1 M [TBA]PF<sub>6</sub>).

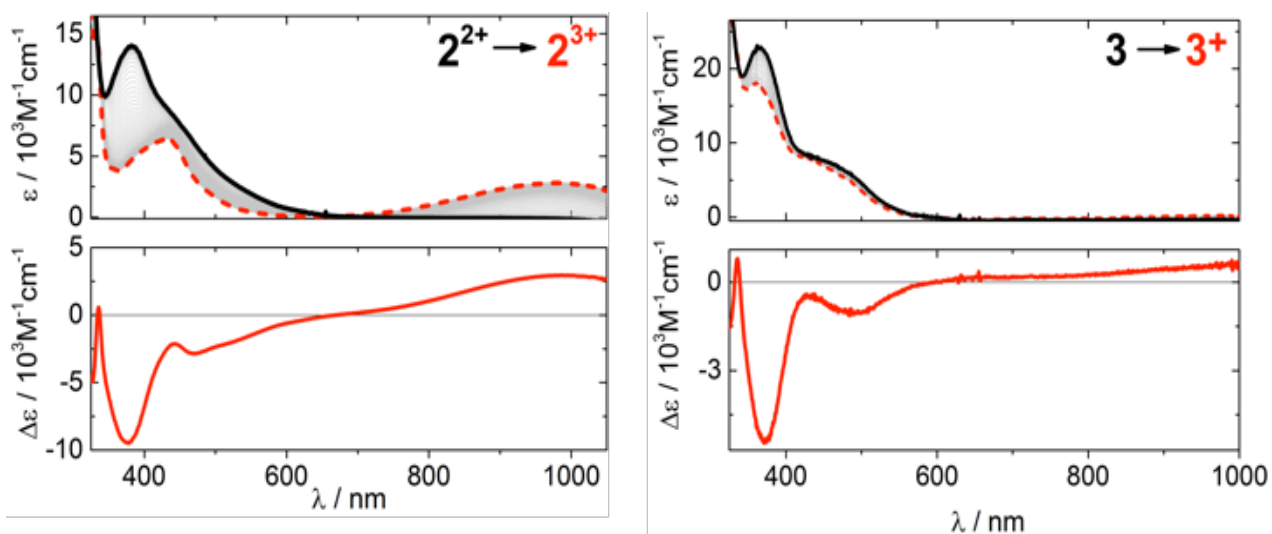

**Figure S6:** Spectral evolution and difference spectra during the  $\text{tpy} \rightarrow \text{tpy}^-$  reduction process (initial: solid black curve, final: dashed blue curve, intermediate: grey curves) of complexes of complexes **2** (left) and **3** (right) in DMSO (0.1 M [TBA]PF<sub>6</sub>).

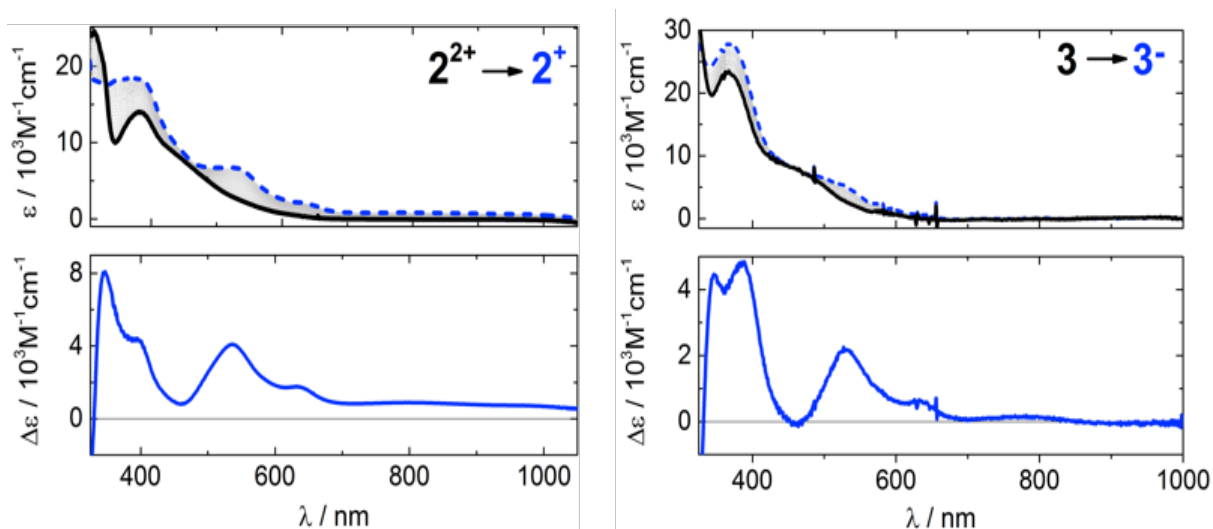

**Figure S7:** Sum of the oxidative and reductive difference spectra of complexes **2** and **3** in DMSO. Red and blue signals represent, respectively, the positive and negative expected signals in TA spectroscopy.

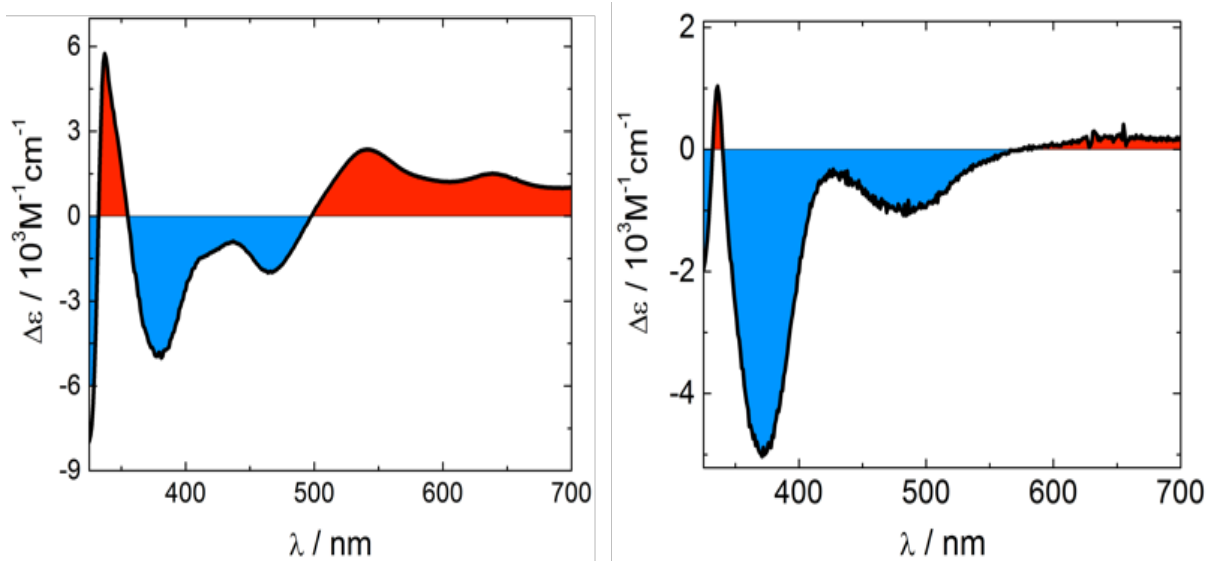

#### REFERENCES

1. Cadranel, A.; Albores, P.; Yamazaki, S.; Kleiman, V. D.; Baraldo, L. M., Efficient energy transfer via the cyanide bridge in dinuclear complexes containing Ru(II) polypyridine moieties. *Dalton Transactions* **2012**, 41 (17), 5343-5350.
